# Supplementary material
Source: Springer Nature journal article supplement (https://www.springermedizin.de/resource/supplementary/12884_2008_34_MOESM2_ESM.pdf/9459786)
Supplement: MOESM2 [file 9459786]

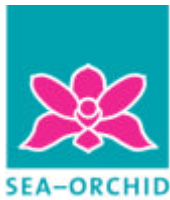

# Evidence-Based Practice Survey (STAFF only) TH (A)

- Please complete this form if you are a clinical staff member at the maternity, child health or newborn service.
- Please answer all questions with a **number in the boxes provided** and/or write additional comments where required.

## General Information

1. Today's date \_\_\_\_\_/\_\_\_\_\_/2005

2. Age at last birthday

3. Gender   
1 = male                      2 = female

4. Please state which hospital you are from  
\_\_\_\_\_

5. Profession   
1 = Specialist in O & G  
2 = Neonatologist  
3 = Paediatrician  
4 = Resident (RMO)  
5 = Nurse  
6 = Midwife  
7 = Other, please specify  
\_\_\_\_\_

6. Years practising in the profession above (in Q.5)

7. Do you belong to a professional organisation(s)?   
1 = no  
2 = yes, please specify  
\_\_\_\_\_

8. What type of in-service training is usually offered in your workplace?   
1 = none  
2 = technical/professional  
3 = administrative/managerial  
4 = both of the above  
5 = do not know  
6 = other, please specify  
\_\_\_\_\_

9. Do you have easy access to a computer at your workplace?   
1 = no  
2 = yes, without internet connection  
3 = yes, with phone internet connection  
4 = yes, with broadband internet connection

10. If you answered **no** to question 9, what **greatest** difficulty do you have in accessing a computer with internet connection?   
1 = located too far from my workplace  
2 = booking required  
3 = unreliable internet connection  
4 = limited supply of computers available  
5 = computers always in use  
6 = have to use my own computer at home  
7 = other, please specify  
\_\_\_\_\_

## Health Information Needs

11. What are generally the reasons you consult health information sources? **Please respond with 1, 2, 3, as below**  
1 = never                      2 = sometimes                      3 = frequently

a) patient care

b) teaching

c) research

d) personal study

e) other reasons, please specify   
\_\_\_\_\_

12. How often do you use the following resources?  
**Please respond with 1, 2 or 3, as below**  
1 = never    2 = sometimes    3 = frequently

a) textbooks

b) journals

c) resources from pharmaceutical companies

d) colleagues

e) conferences

f) staff meetings

g) internet, please specify which websites you find most helpful   
\_\_\_\_\_

h) other, please specify   
\_\_\_\_\_

13. How much time do you spend reading work-related literature in an average week?   
1 = less than one hour  
2 = 1-2 hours  
3 = 3 or more hours

14. In the past year, have you participated in any of the following professional activities related to your area of work, either as a participant or presenter? **Please respond with 1 or 2**  
1 = no                      2 = yes

a) conference/congress

b) training workshop

c) seminar

d) case study presentation

e) other, please specify   
\_\_\_\_\_

## Evidence-Based Practice

15. Have you heard about any of the following: evidence-based practice, evidence-based care or evidence-based medicine?   
1 = no                      2 = yes

If you answered yes, what do you understand by evidence-based practice?  
\_\_\_\_\_  
\_\_\_\_\_  
\_\_\_\_\_

16. Have you ever attended a course or workshop on evidence-based practice/care/medicine?   
1 = no                      2 = yes

17. Are you or have you been an author on a systematic review?   
1 = no    2 = yes, state what topic(s) you reviewed  
\_\_\_\_\_  
\_\_\_\_\_

## Knowledge About The Cochrane Library

18. Have you heard about The Cochrane Library?   
1 = yes    2 = no, **please go to question 25**

19. Do you have access to The Cochrane Library?   
1 = yes    2 = don't know  
3 = no, **please go to question 24**

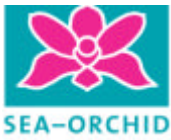

# Evidence-Based Practice Survey (STAFF only) cont. TH (A)

20. If you have access, how often do you use The Cochrane Library?  
 1 = never, **please go to question 24**  
 2 = once a year  
 3 = once a month  
 4 = once a week  
 5 = more than once a week

21. Where do you **most often** access The Cochrane Library?  
 1 = at home  
 2 = on your ward  
 3 = within your department  
 4 = the hospital library  
 5 = other hospital wards  
 6 = other hospital departments  
 7 = other, please specify

22. Do you find The Cochrane Library a helpful tool for your clinical practice?  
 1 = yes    2 = sometimes  
 3 = no, **please go to question 24**

23. If you answered **yes**, please comment on what in particular you find useful.

24. Have you ever attended a Cochrane Library workshop?  
 1 = yes    2 = no

### Knowledge About WHO RHL

25. Have you heard about the WHO Reproductive Health Library (RHL)?  
 1 = yes    2 = no, **please go to question 32**

26. Do you have access to RHL?  
 1 = yes    2 = do not know  
 3 = no, **please go to question 31**

27. If you have access to RHL, how often do you use it?  
 1 = never, **please go to question 31**  
 2 = once a year  
 3 = once a month  
 4 = once a week  
 5 = more than once a week

28. Where do you **most often** access RHL?  
 1 = at home  
 2 = on your ward  
 3 = within your department  
 4 = the hospital library  
 5 = other hospital wards  
 6 = other hospital departments  
 7 = other, please specify

29. Do you find RHL a helpful tool for your clinical practice?  
 1 = yes    2 = sometimes  
 3 = no, **please go to question 31**

30. If you answered **yes** or **sometimes**, what in particular do you find useful?  
 1 = video clips/practical aspects  
 2 = commentaries  
 3 = systematic reviews  
 4 = internet links  
 5 = other, please specify

31. Have you ever attended a RHL workshop?  
 1 = yes    2 = no

### Clinical Practice Change

32. Have you ever been involved in changing an established clinical practice?  
 1 = yes    2 = no, **please go to question 38**

33. If you answered **yes**, who initiated the change?  
 1 = you  
 2 = a colleague  
 3 = senior staff  
 4 = head of department/management  
 5 = do not know  
 6 = other, please specify

34. In your opinion, why was the change made?  
 1 = new evidence  
 2 = new drug available  
 3 = new procedure/health technology available  
 4 = legal implications  
 5 = do not know  
 6 = other, please specify

35. Was there any resistance to changing clinical practice?  
 1 = no, **please go to question 38**  
 2 = yes, minor resistance  
 3 = yes, major resistance

36. If you answered **yes**, in your opinion, what was the **major reason** for the resistance?  
 1 = no or little consultation prior to change  
 2 = no discussions provided at implementation stage for staff  
 3 = language difficulties  
 4 = difficulty accessing new clinical guidelines  
 5 = other, please specify

37. In your opinion, what would be the best course of action to overcome the main identified reason for resistance?  
 1 = translation of guidelines  
 2 = multidisciplinary workshops  
 3 = discussion groups within professional groups  
 4 = provide easy access to guidelines  
 5 = other, please specify

### Workshop Attendance

38. Would you be interested in attending any of the workshops listed below? **Please respond with 1, 2 or 3, as below**

- 1 = yes    2 = no    3 = maybe
- a) How to use the RHL more effectively?
- b) How to access information from the Cochrane Library?
- c) EBP workshop including critical appraisal and understanding systematic reviews
- d) Developing clinical practice guidelines
- e) Implementing evidence into clinical practice
- f) Other workshop suggestion(s), please specify

39. If you answered **yes**, what would prevent you from attending such a workshop? **Please respond with 1, 2 or 3, as below**

- 1 = yes    2 = no    3 = maybe
- a) = nothing
- b) = too busy
- c) = language barrier
- d) = no financial support
- e) = other, please specify

**Thank you for your time and participation with this survey. Please return form to:**
